# Supplementary material for: A Comprehensive Evaluation of ZrC Nanoparticle in Combined Photothermal and Radiation Therapy for Treatment of Triple-Negative Breast Cancer
Source: Frontiers journal article supplement (doi:10.3389/fonc.2021.801352), 2021-12-21
Supplement: Data_Sheet_1.PDF [file Data_Sheet_1.PDF]

## Supporting Information

### A comprehensive evaluation of ZrC nanoparticle in combined photothermal and radiation therapy for treatment of triple-negative breast cancer

Jiang shan<sup>a</sup>, Liu zhao<sup>a</sup>, Tian yuhang<sup>a</sup>, Zhuang ming<sup>b</sup>, Piao shiqi<sup>b</sup>, Gao yan<sup>c</sup>, Andraw Tam<sup>d</sup>, Hu hongtao<sup>b\*</sup> and Cheng wen<sup>a\*</sup>.

<sup>a</sup>Department of ultrasound, Harbin Medical University Cancer Hospital, Nangang District, Harbin, Heilongjiang Province, 150086, P. R. China

<sup>b</sup>Department of radiation oncology, Harbin Medical University Cancer Hospital, Nangang District, Harbin, Heilongjiang Province, 150086, P. R. China

<sup>c</sup>School of Chemistry and Chemical Engineering, Harbin Institute of Technology, Harbin 150001, China

<sup>d</sup>Department of radiation oncology, City of Hope National Medical Center, 1500 East Duarte Road, Duarte CA 91010-3000, United States.

Corresponding author: [hrbchengwen@163.com](mailto:hrbchengwen@163.com) Cheng wen

[huht9099@sohu.com](mailto:huht9099@sohu.com) Hu hongtao

Jiang shan and Liu zhao contributed equally to this study.

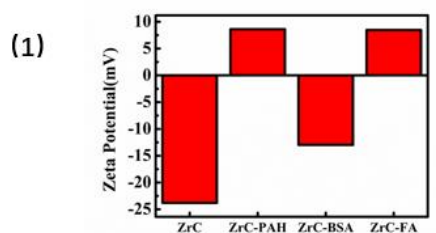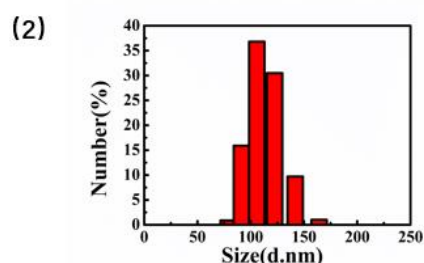

(3)

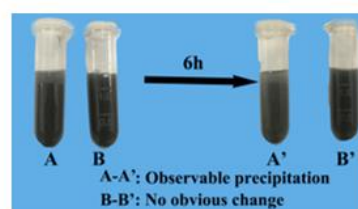

(4)

| Z  | Element | Family | Atomic Fraction (%) | Atomic Error (%) | Mass Fraction (%) | Mass Error (%) | Fit error (%) |
|----|---------|--------|---------------------|------------------|-------------------|----------------|---------------|
| 6  | C       | K      | 46.55               | 8.18             | 10.29             | 1.18           | 0.53          |
| 40 | Zr      | K      | 53.45               | 11.6             | 89.71             | 15.37          | 0.07          |

S1: Zeta potentials of as-prepared ZrC NPs,  
 S2: Dynamic Light Scattering (DLS) data about the size distribution of ZrC NPs  
 S3: Stability in physiological solutions of ZrC NPs. A is the ZrC powder dissolved in PBS and B is the solution of ZrC NPs.  
 S4: Analysis of TEM

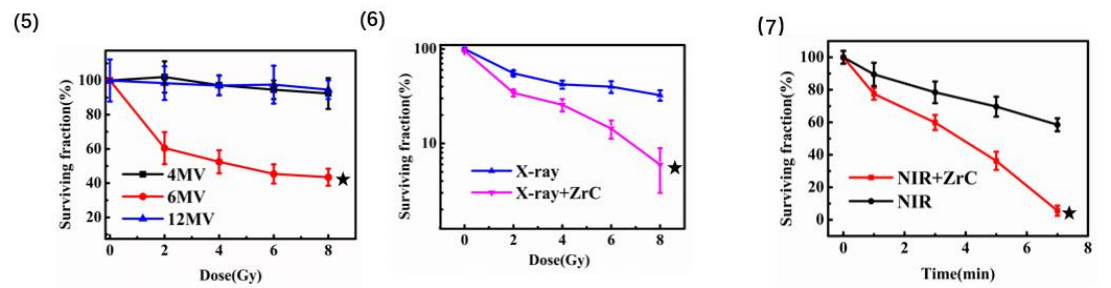

S5, Detection of the appropriate time of NIR irradiation for combine therapy  
 S6-7, Exploration of effective energy level of X-ray radiation and dose(b-c), Error bars represent mean  $\pm$  SD. P values based on Student's t-test: \*p < 0.05.

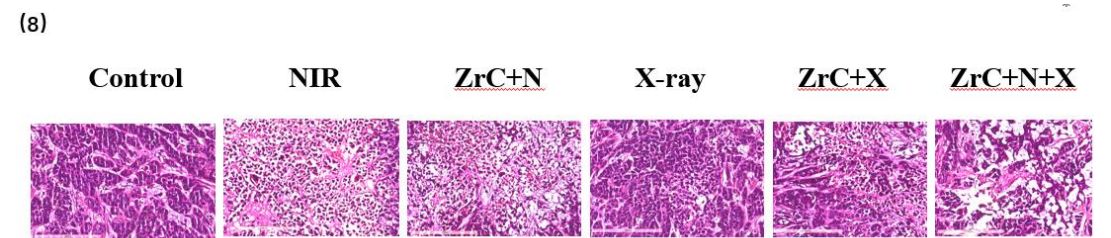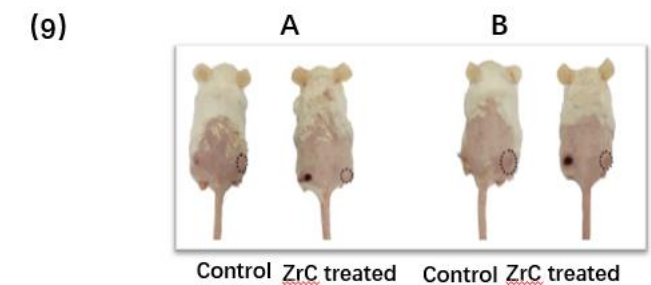

S8: Histology analysis of tumor tissues in (H&E) method.  
 S9: Pictures of Balb/c mice with bilateral tumors

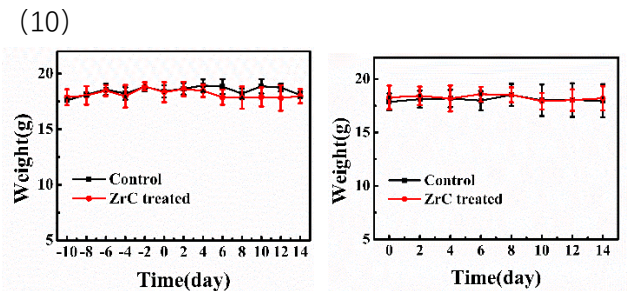

S10: The variations in weight of mice in two groups.

(11)

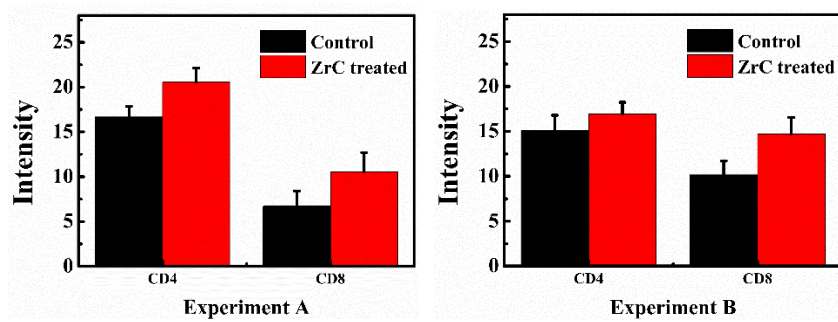

S11, Detect of T lymphocytes in distant tumors in flow cytometry.

(a/b) Error bars represent mean  $\pm$  SD. P values based on Student's t-test: \*P < 0.05

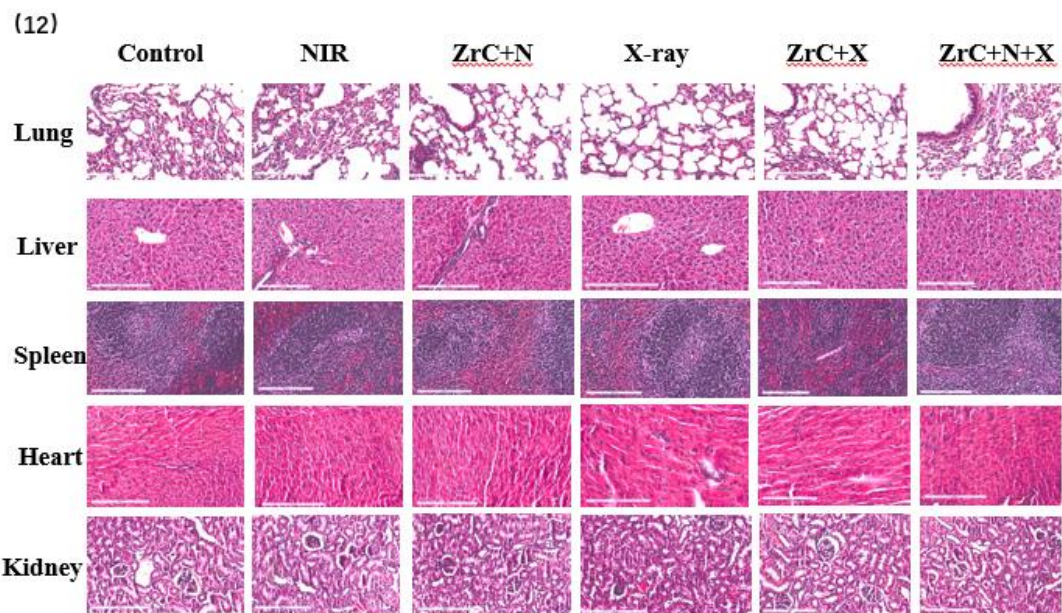

S12

H & E staining image of main organs in healthy female Balb/c mice after treatment.

ZrC+N, ZrC+X and ZrC+N+X groups were treated with intratumoral injection of ZrC NPs (200  $\mu$ g/mice).

(13)

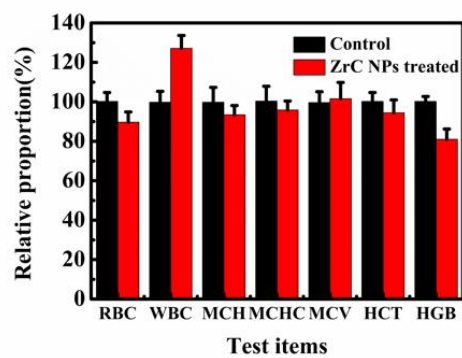

(14)

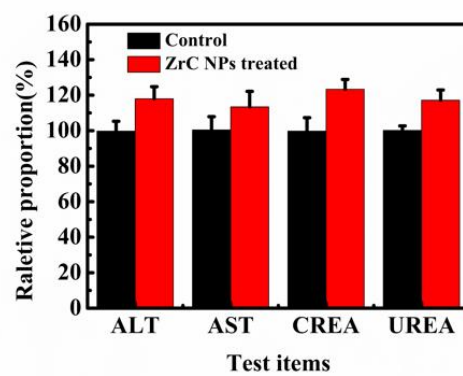

S13: Blood routine analysis of the mice.

S14: Serum biochemical analysis of the mice. Error bars represent mean  $\pm$  SD.
